# Supplementary material for: Remodeling Membrane Binding by Mono-Ubiquitylation
Source: PubMed Central journal article supplement (PMC6723200; doi:10.3390/biom9080325), 2019-07-31
Supplement: biomolecules-09-00325-s001.pdf [file biomolecules-09-00325-s001.pdf]

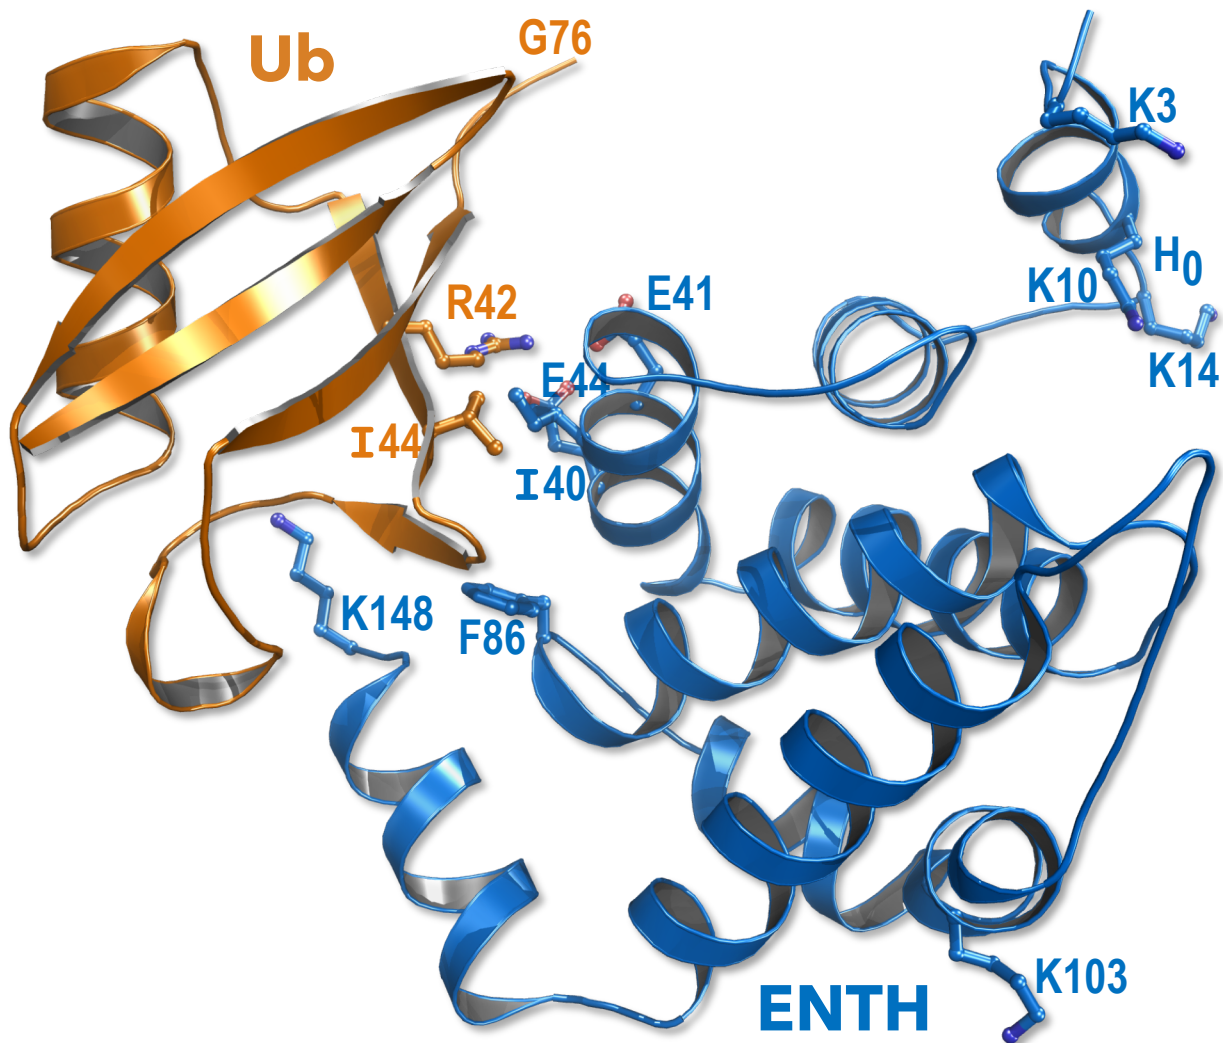

**Supplementary Figure 2. Structural model of ENTH:Ub complex.** We superimposed the yeast ENTH on the STAM-VHS:Ub complex (3LDZ) and then use Fiberdoc for flexible induced-fit backbone refinement [39]. The residues at the binding interface and the lysine residues that undergo ubiquitylation are shown as sticks.

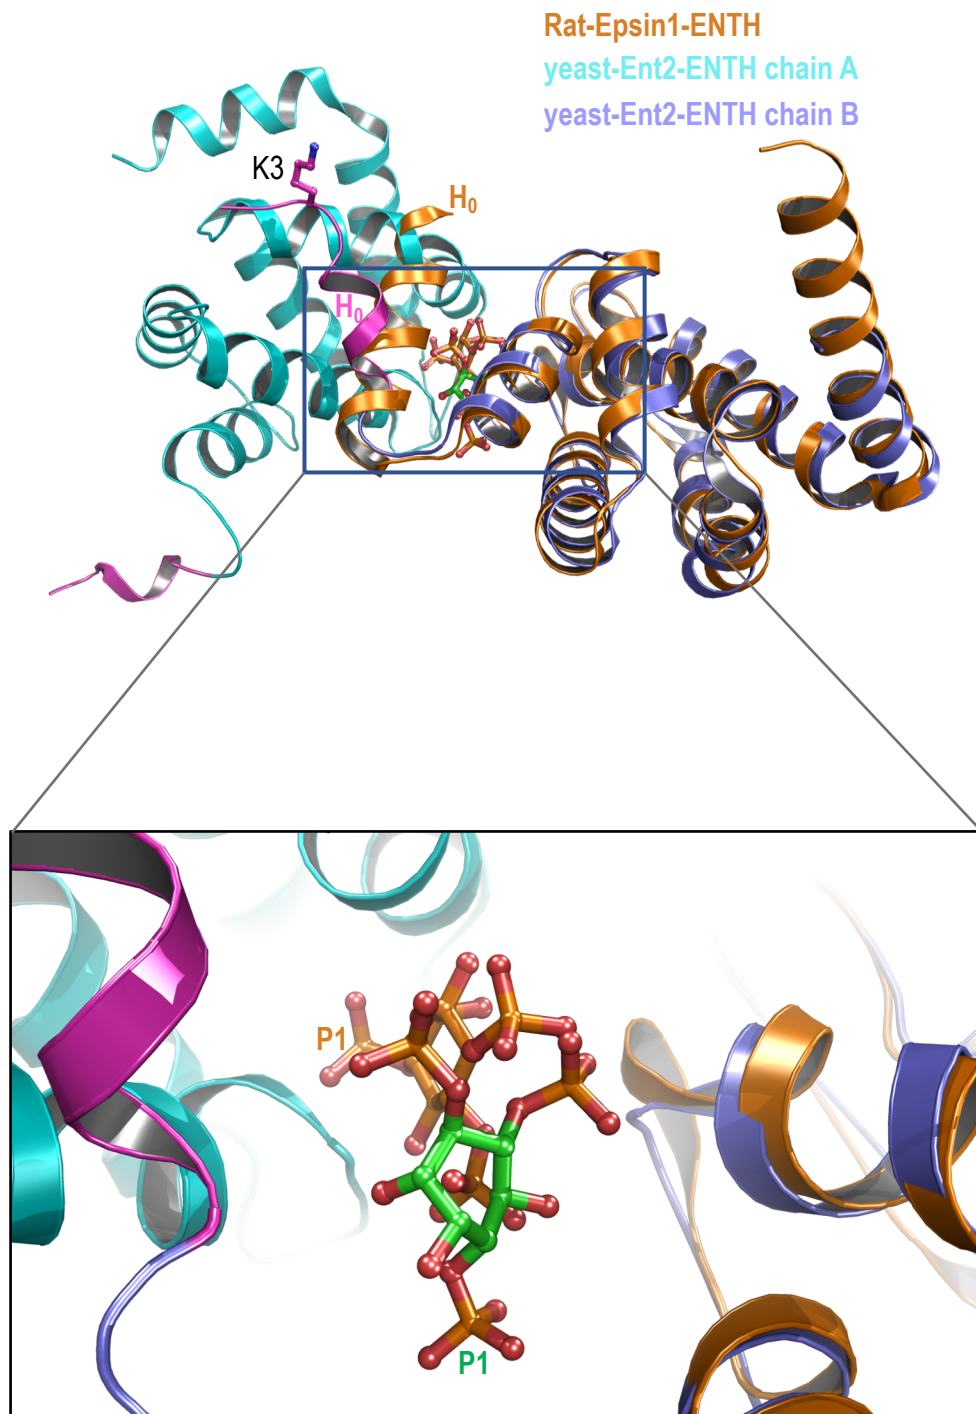

**Supplementary Figure 3. structure of yeast Ent2 homo dimer super imposed with rat Epsin1 ENHT domains.** Top shows the overall structure of the proteins domain. The changes in the orientation of H<sub>0</sub> is shown. Bottom, is a zoom-in into the ligand binding site, shows the different location and orientation of the PIP<sub>2</sub> molecules. The orange PIP<sub>2</sub> is from the rat-ENTH complex and the green molecule is from the Ent2 complex.
